# Supplementary material
Source: ML conference proceedings conference paper supplement (https://openreview.net/forum?id=oElWLpkOux)
Supplement: supplementary_material [file OrbitZoo_NeurIPS2025_Supplementary.pdf › OrbitZoo_NeurIPS_Supplementary/OrbitZoo_NeurIPS2025_Supplementary.pdf]

# 1 Supplementary Material

## 2 1.1 OrbitZoo vs. Herrera: Environment Comparison

3 To compare OrbitZoo’s capabilities with those of existing environments that offer publicly available  
4 code, we extend our analysis by implementing the mission proposed by Herrera in [1].

### 5 1.1.1 Definition

6 Herrera developed a reinforcement learning environment for station-keeping in Low Earth Orbit  
7 (LEO). While Keplerian orbits describe a well-defined elliptical path around a central body, real-  
8 world satellites are influenced by perturbative forces beyond gravity, causing them to drift from their  
9 nominal orbits over time. Station-keeping missions aim to apply strategic control – through attitude  
10 adjustments or thrust maneuvers – to maximize the duration a satellite stays within its designated  
11 orbit. This task becomes especially challenging and critical in LEO due to the significant impact of  
12 atmospheric drag.

### 13 1.1.2 Environment Setup

14 **Objective and Environment Characteristics.** In this mission, Herrera employed PPO to train  
15 a satellite to control its thrust for station-keeping. The environment’s dynamics were manually  
16 implemented using a 4th-order Yoshida integrator, which computes the satellite’s next position and  
17 velocity based on gravitational and drag forces. The satellite began on a circular orbit at an altitude of  
18 550 km above Earth’s surface, with the objective of maintaining that altitude for as long as possible  
19 without deviating by more than 1 meter.

20 Herrera also clearly defined the episode termination conditions: (1) each episode has a maximum  
21 duration of 800 steps, with each step representing 1 second; (2) if the satellite does not perform any  
22 maneuvers, it exceeds the threshold after approximately 200 steps due to natural drift; and (3) the  
23 satellite is provided with enough fuel to apply maximum thrust for up to 125 steps. For a mission  
24 requiring this level of precision, the differences in dynamic modeling are critical. As stated by  
25 Herrera: *"The 4th Order Yoshida integrator is used as the default integrator as there is a balance*  
26 *of performance and error. RK4, while generally having less error, is not a semantic integrator and*  
27 *requires the calculation of the acceleration 4 times while the Yoshida integrator only requires 3."*  
28 Given the difference in integration methods – Herrera employing the faster but less precise Yoshida  
29 integrator, and OrbitZoo using the more accurate Dormand-Prince integrator (a RK4 integrator  
30 with adaptive time steps) – we conduct a direct comparison between the values produced by each  
31 environment over the course of a full episode, starting from the same initial position and velocity. As  
32 shown in Figure 1, the difference in position after approximately 13 minutes is around 25 meters,  
33 while the difference in velocity is around 0.08 meters per second. With this comparison, we note that  
34 the one meter threshold initially defined for episode termination is extremely strict under realistic  
35 dynamic conditions. The code needed to run this comparison is provided in the supplementary  
36 material.

37 Following Herrera’s setup, we designed a similar mission in which the agent has an initial mass of  
38 100 kg, including 75 kg of fuel. The satellite is modeled as a perfect sphere with a radius of 16.8 meters,  
39 a drag coefficient of 2.123 and is equipped with a thruster characterized by a specific impulse of  
40  $I_{sp} = 0.0067$  s. While this configuration is not physically realistic, it was chosen to maintain  
41 consistency with Herrera’s termination conditions (2) and (3). Notably, in OrbitZoo, atmospheric  
42 drag is not solely determined by the satellite’s current state (as in Herrera’s implementation) but also  
43 incorporates historical data, allowing drag to vary dynamically based on the current moment.

44 **Action Space.** To simplify the problem, Herrera limits the action space to the orbital plane,  
45 and considers a polar thrust representation  $(T, \theta)$ . However, the action the agent performs is  
46 not directly the thrust being applied, but the variation applied to the current thrust, creating a  
47 smoother and more realistic maneuver:  $a_t = (\Delta T, \Delta \theta)$ . While the maximum thrust is char-  
48 acterized by  $(T_{\max}, \theta_{\max}) = (0.04, 2\pi)$ , the action space is limited to a fraction of that change:  
49  $(\Delta T_{\max}, \Delta \theta_{\max}) = (T_{\max}/50, \theta_{\max}/6)$ .

50 **Observation Space.** Similarly to Herrera, we use Cartesian coordinates to represent the current  
51 position  $r \in \mathbb{R}^2$  and velocity  $\dot{r} \in \mathbb{R}^2$  of the satellite. Additionally, we also define the distance to the

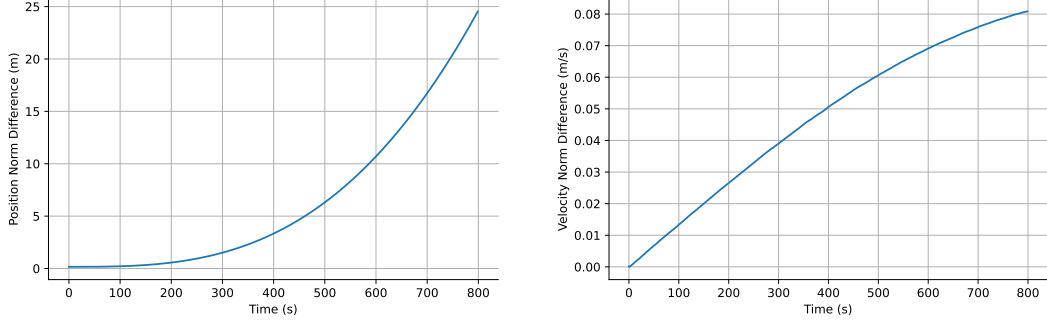

(a) Euclidean distance between Herrera's and OrbitZoo's propagated position, per second.

(b) Euclidean distance between Herrera's and OrbitZoo's propagated velocity, per second.

Figure 1: Comparison between Herrera's and OrbitZoo's natural propagation: position and velocity differences over time.

Table 1: OrbitZoo vs. Herrera: Training hyperparameters.

| Parameter                       | Value       |
|---------------------------------|-------------|
| Actor learning rate             | 0.0001      |
| Critic learning rate            | 0.001       |
| GAE $\lambda$                   | 0.95        |
| Epochs                          | 5           |
| Discount factor ( $\gamma$ )    | 0.99        |
| Clip ( $\epsilon$ )             | 0.03        |
| Initial Standard Deviation      | 0.5         |
| Standard Deviation Decay Rate   | 10000 steps |
| Standard Deviation Decay Amount | 0.05        |
| Minimum Standard Deviation      | 0.05        |
| Experiences for Training        | 800         |
| Batch Size                      | 64          |

nominal altitude,  $r_{\text{target}} = ||r|| - r_{\text{nominal}}$  and nominal velocity,  $\dot{r}_{\text{target}} = ||\dot{r}|| - \dot{r}_{\text{nominal}}$ , where

$$r_{\text{nominal}} = 550 \text{ km} \quad \dot{r}_{\text{nominal}} = \sqrt{\frac{\mu_E}{r_{\text{nominal}}}},$$

with  $\mu_E$  representing the gravitational parameter of Earth. The observation  $o_t \in \mathbb{R}^8$  consists of:

$o_t = (r/r_{\text{nominal}}, \dot{r}/\dot{r}_{\text{nominal}}, r_{\text{target}}, \dot{r}_{\text{target}}, \theta, T)$ .

**Reward Function.** In order to encourage the agent to both not run out of fuel and stay within the orbital termination threshold, the reward function is similar to Herrera's:

$$r_t = \begin{cases} 0 & \text{if } r_{\text{target}} > 1\text{m} \vee f = 0 \\ \frac{t}{800} + 0.5 & \text{otherwise} \end{cases}, \quad (1)$$

where  $f$  is the current available fuel in kg, and  $t$  is the current step within the episode.

### 1.1.3 Results

Similarly to Herrera, we employed PPO to trained the agent, with the algorithm hyperparameters being shown in Table 1. If the agent can consistently exceed the baseline of 200 steps – representing the duration a satellite remains within tolerance without maneuvers – it demonstrates successful station-keeping. Figure 2 illustrates that, despite the narrow 1-meter tolerance from the nominal orbit (together with the more realistic perturbations), the agent effectively learned to maintain station-keeping by surpassing those 200 steps consistently.

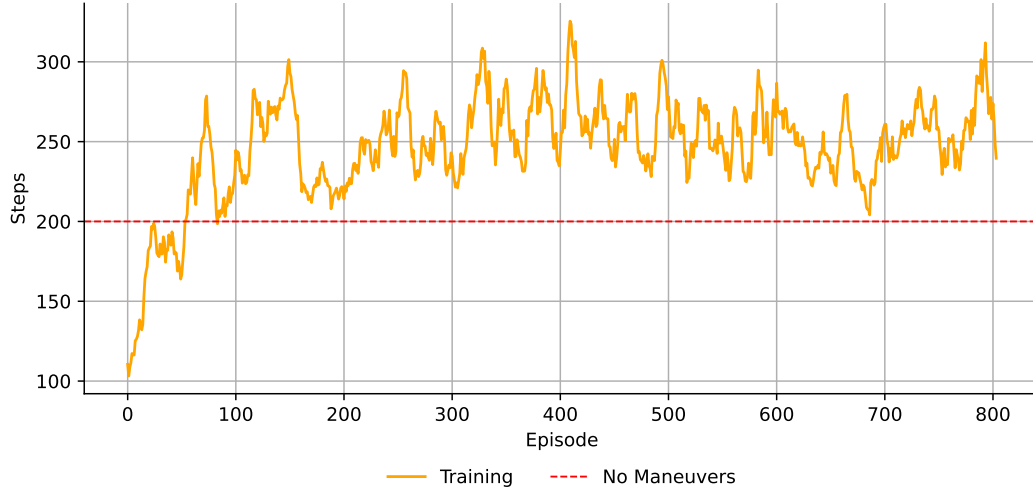

Figure 2: Steps per episode, averaged by a sliding window of 10 episodes. If no maneuvers are executed, the satellite exits the allowed tolerance range by step 200.

#### 65 1.1.4 Challenges and Future Improvements

66 The agent did not achieve the same level of performance as in Herrera’s environment, primarily due to  
 67 differences in the dynamics, as demonstrated earlier. Additionally, the PPO implementations differed  
 68 – one using TensorFlow and the other PyTorch – with variations in hyperparameters.

69 This attempt to replicate Herrera’s environment suggests that OrbitZoo could benefit from using  
 70 faster propagators. While these may be less precise, they are suitable for RL missions where extreme  
 71 precision is not critical. As Herrera points out, continuous but deterministic algorithms (such as  
 72 DDPG and TD3) may be better suited for this mission due to the precision required in controlling  
 73 thrust maneuvers – something that is challenging to achieve with PPO.

74 **References**

- 75 [1] Armando Herrera III. Reinforcement learning environment for orbital station-keeping. Master's  
76 thesis, The University of Texas Rio Grande Valley, 2020. ScholarWorks @ UTRGV.
