# Supplementary material
Source: ML conference proceedings conference paper supplement (https://openreview.net/forum?id=oElWLpkOux)
Supplement: supplementary_material [file WMM2020testvalues.pdf › orekit-data/WMM2020COF/WMM2020testvalues.pdf]

## Test Values for WMM2020

The computation was carried out with double precision arithmetic. Single precision arithmetic can cause differences of up to 0.1 nT. Heights are with respect to the WGS 84 Ellipsoid. Grid Variation is with respect to the Grid North of the Universal Polar Stereographic Projection

| Date   | Height (km) | Lat (Deg) | Lon (Deg) | X (nT)       | Y (nT)       | Z (nT)       | H (nT)       | F (nT)       | I (Deg)       | D (Deg)       | GV (Deg) |
|--------|-------------|-----------|-----------|--------------|--------------|--------------|--------------|--------------|---------------|---------------|----------|
| 2020   | 0           | 80        | 0         | 6570.4       | -146.3       | 54606.0      | 6572.0       | 55000.1      | 83.14         | -1.28         | -1.28    |
| 2020   | 0           | 0         | 120       | 39624.3      | 109.9        | -10932.5     | 39624.4      | 41104.9      | -15.42        | 0.16          |          |
| 2020   | 0           | -80       | 240       | 5940.6       | 15772.1      | -52480.8     | 16853.8      | 55120.6      | -72.20        | 69.36         | -50.64   |
| 2020   | 100         | 80        | 0         | 6261.8       | -185.5       | 52429.1      | 6264.5       | 52802.0      | 83.19         | -1.70         | -1.70    |
| 2020   | 100         | 0         | 120       | 37636.7      | 104.9        | -10474.8     | 37636.9      | 39067.3      | -15.55        | 0.16          |          |
| 2020   | 100         | -80       | 240       | 5744.9       | 14799.5      | -49969.4     | 15875.4      | 52430.6      | -72.37        | 68.78         | -51.22   |
| 2022.5 | 0           | 80        | 0         | 6529.9       | 1.1          | 54713.4      | 6529.9       | 55101.7      | 83.19         | 0.01          | 0.01     |
| 2022.5 | 0           | 0         | 120       | 39684.7      | -42.2        | -10809.5     | 39684.7      | 41130.5      | -15.24        | -0.06         |          |
| 2022.5 | 0           | -80       | 240       | 6016.5       | 15776.7      | -52251.6     | 16885.0      | 54912.1      | -72.09        | 69.13         | -50.87   |
| 2022.5 | 100         | 80        | 0         | 6224.0       | -44.5        | 52527.0      | 6224.2       | 52894.5      | 83.24         | -0.41         | -0.41    |
| 2022.5 | 100         | 0         | 120       | 37694.0      | -35.3        | -10362.0     | 37694.1      | 39092.4      | -15.37        | -0.05         |          |
| 2022.5 | 100         | -80       | 240       | 5815.0       | 14803.0      | -49755.3     | 15904.1      | 52235.4      | -72.27        | 68.55         | -51.47   |
| Date   | Height (km) | Lat (Deg) | Lon (Deg) | Xdot (nT/yr) | Ydot (nT/yr) | Zdot (nT/yr) | Hdot (nT/yr) | Fdot (nT/yr) | Idot (deg/yr) | Ddot (deg/yr) |          |
| 2020   | 0           | 80        | 0         | -16.2        | 59.0         | 42.9         | -17.5        | 40.5         | 0.02          | 0.51          |          |
| 2020   | 0           | 0         | 120       | 24.2         | -60.8        | 49.2         | 24.0         | 10.1         | 0.08          | -0.09         |          |
| 2020   | 0           | -80       | 240       | 30.4         | 1.8          | 91.7         | 12.4         | -83.5        | 0.04          | -0.10         |          |
| 2020   | 100         | 80        | 0         | -15.1        | 56.4         | 39.2         | -16.8        | 36.9         | 0.02          | 0.51          |          |
| 2020   | 100         | 0         | 120       | 22.9         | -56.1        | 45.1         | 22.8         | 9.8          | 0.07          | -0.09         |          |
| 2020   | 100         | -80       | 240       | 28.0         | 1.4          | 85.6         | 11.4         | -78.1        | 0.04          | -0.09         |          |
| 2022.5 | 0           | 80        | 0         | -16.2        | 59.0         | 42.9         | -16.2        | 40.7         | 0.02          | 0.52          |          |
| 2022.5 | 0           | 0         | 120       | 24.2         | -60.8        | 49.2         | 24.2         | 10.5         | 0.08          | -0.09         |          |
| 2022.5 | 0           | -80       | 240       | 30.4         | 1.8          | 91.7         | 12.6         | -83.4        | 0.04          | -0.09         |          |
| 2022.5 | 100         | 80        | 0         | -15.1        | 56.4         | 39.2         | -15.5        | 37.1         | 0.02          | 0.52          |          |
| 2022.5 | 100         | 0         | 120       | 22.9         | -56.1        | 45.1         | 23.0         | 10.2         | 0.07          | -0.09         |          |
| 2022.5 | 100         | -80       | 240       | 28.0         | 1.4          | 85.6         | 11.6         | -78.0        | 0.04          | -0.09         |          |
